# Supplementary material
Source: publisher site journal article supplement (https://www.dovepress.com/article/283515)
Supplement: Supplementary file 1 [file get_supplementary_file.php]

Supporting Information

**CD44-targeting oxygen self-sufficient nanoparticles for enhanced photodynamic therapy against malignant melanoma**

Xiaoyang Hou1,*, Yingkai Tao1,*, Xinxin Li1,*, Yanyu Pang1, Chunsheng Yang2, Guan Jiang1,# , Yanqun Liu1,#

1 Department of Dermatology, The Affiliated Hospital of Xuzhou Medical University, Xuzhou 221002, China.

2 Department of Dermatology, the Affiliated Huai'an Hospital of Xuzhou Medical University, the Second People’s Hospital of Huai'an, No.62, Huaihai Road(S.), Huai'an, 223002, China.

* These authors contributed equally to this article.

**# Correspondence**

Guan Jiang, Department of Dermatology, The Affiliated Hospital of Xuzhou Medical University, 99 West Huai Hai Road, Xuzhou, Jiangsu 221002, P.R. China. E-mail: [dr.guanjiang@xzhmu.edu.cn](mailto:dr.guanjiang@xzhmu.edu.cn);

Yanqun Liu, Department of Dermatology, The Affiliated Hospital of Xuzhou Medical University, 99 West Huai Hai Road, Xuzhou, Jiangsu 221002, P.R. China.E-mail: xyfylyq@sohu.com.

**Figure Legends**

**
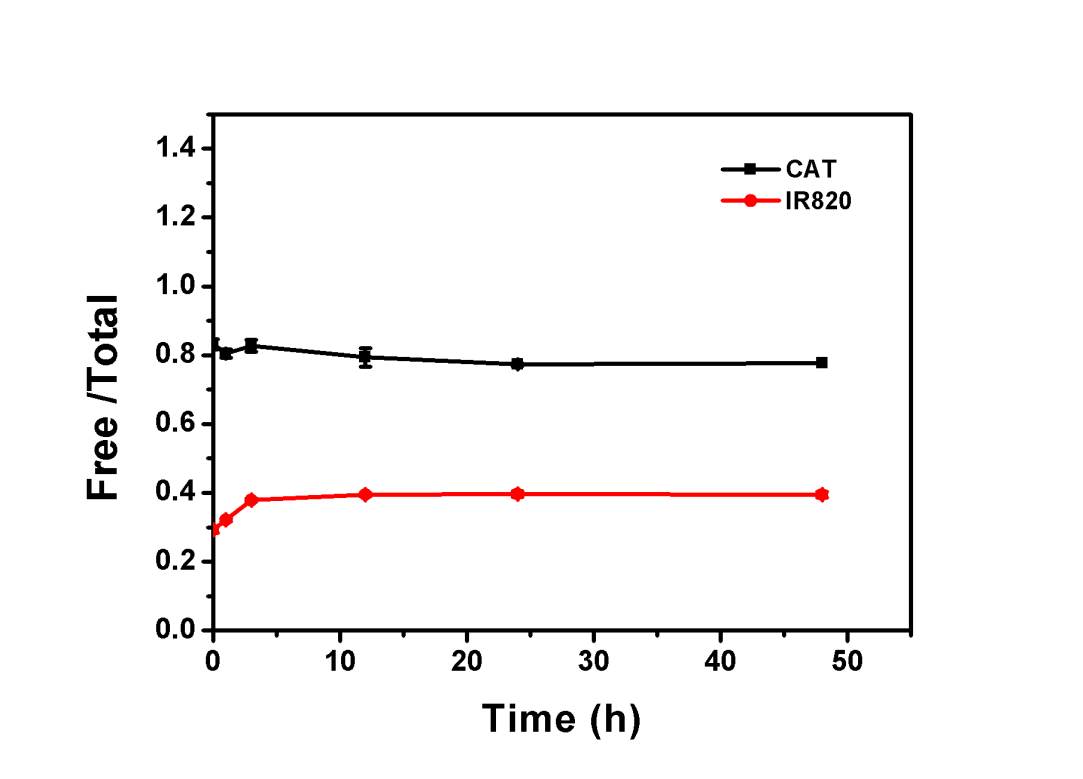
**

**Figure S1** Study on drug release of HCINPs.

**
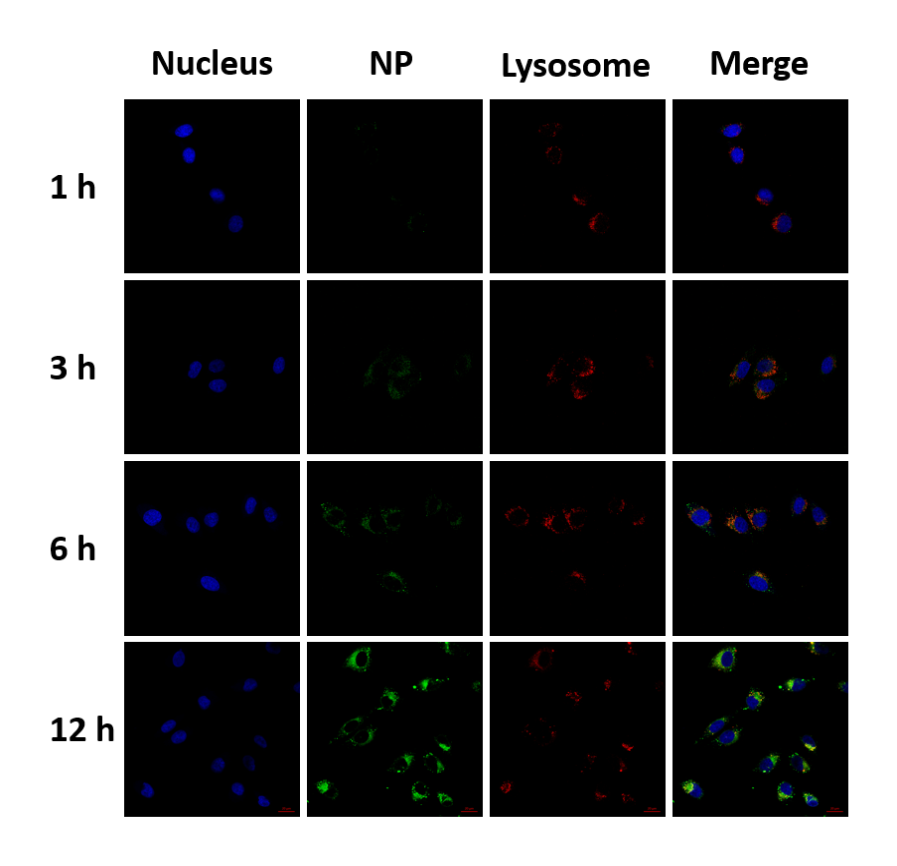
**

**Figure S2** Time-dependent cellular uptake of HCINPs (NP) by MV3 cells measured using CLSM.

**
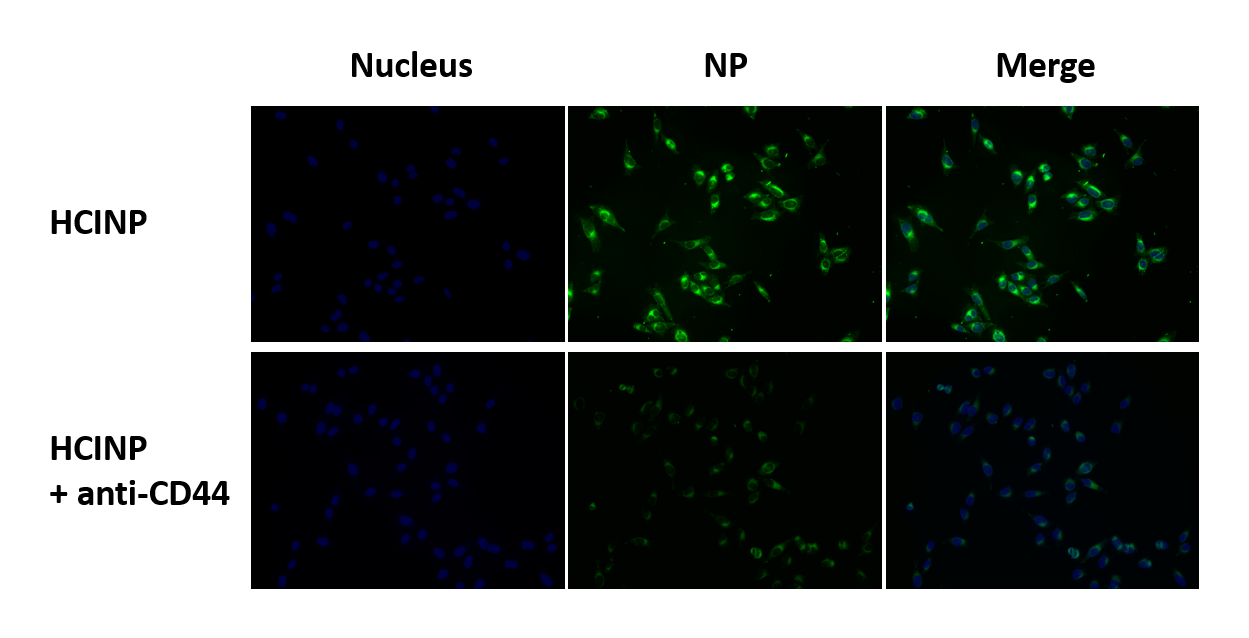
**

**Figure S3** Targeting effect analysis of HCINPs (NP). MV3 cells were preprocessed by CD44 antibody for 4 h. 16 µg/mL HCINP was then added for another 4 h incubation. Images were taken by inverted fluorescence microscope (200×).

**
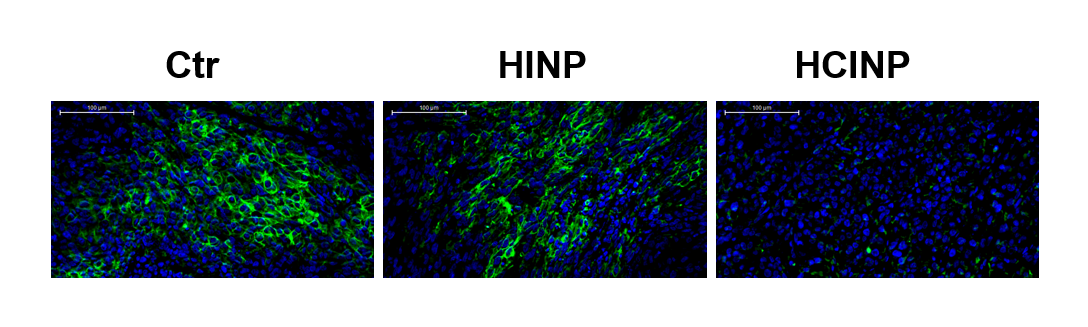
**

**Figure S4** Expression of CAIX in tumor tissues (200×).
